# Supplementary material for: Association Between Awareness of Limiting Food Intake and All-cause Mortality: A Cohort Study in Japan
Source: PubMed Central journal article supplement (PMC11078597; doi:10.2188/jea.je20220354), 2024-06-05

**eTable 1.** Characteristics of the study population according to awareness of limiting energy intake

|                                   | Awareness of limiting energy intake |        |        |        | <i>P</i>            |
|-----------------------------------|-------------------------------------|--------|--------|--------|---------------------|
|                                   | No                                  |        | Yes    |        |                     |
|                                   | <i>N</i> (%)                        |        |        |        |                     |
| Men                               | 18,075                              | (100)  | 9,219  | (100)  |                     |
| Age, years                        |                                     |        |        |        |                     |
| 35–49                             | 4,249                               | (23.5) | 2,134  | (23.2) |                     |
| 50–59                             | 6,264                               | (34.7) | 2,729  | (29.6) | <0.001 <sup>a</sup> |
| 60–69                             | 7,562                               | (41.8) | 4,356  | (47.3) |                     |
| Awareness of limiting food intake |                                     |        |        |        |                     |
| Fat intake, yes                   | 2,479                               | (13.7) | 7,827  | (84.9) | <0.001 <sup>b</sup> |
| Sweets intake, yes                | 2,084                               | (11.5) | 7,092  | (76.9) | <0.001 <sup>b</sup> |
| BMI, kg/m <sup>2</sup>            |                                     |        |        |        |                     |
| <18.5                             | 627                                 | (3.5)  | 114    | (1.2)  |                     |
| 18.5–24.9                         | 12,293                              | (68.0) | 6,024  | (65.3) | <0.001 <sup>b</sup> |
| ≥25.0                             | 5,155                               | (28.5) | 3,081  | (33.4) |                     |
| Women                             | 19,099                              | (100)  | 12,379 | (100)  |                     |
| Age, years                        |                                     |        |        |        |                     |
| 35–49                             | 4,905                               | (25.7) | 3,152  | (25.5) |                     |
| 50–59                             | 6,999                               | (36.7) | 4,032  | (32.6) | <0.001 <sup>a</sup> |
| 60–69                             | 7,195                               | (37.7) | 5,195  | (42.0) |                     |
| Awareness of limiting food intake |                                     |        |        |        |                     |
| Fat intake, yes                   | 3,454                               | (18.1) | 11,034 | (89.1) | <0.001 <sup>b</sup> |
| Sweets intake, yes                | 1,679                               | (8.8)  | 9,080  | (73.3) | <0.001 <sup>b</sup> |
| BMI, kg/m <sup>2</sup>            |                                     |        |        |        |                     |
| <18.5                             | 1,852                               | (9.7)  | 811    | (6.6)  |                     |
| 18.5–24.9                         | 13,824                              | (72.4) | 9,070  | (73.3) | <0.001 <sup>b</sup> |
| ≥25.0                             | 3,424                               | (17.9) | 2,500  | (20.2) |                     |

BMI, body mass index.

<sup>a</sup>*P* values obtained by  $\chi^2$  test.

<sup>b</sup>*P* values obtained by logistic regression analysis after adjusted for age (a categorical variable).

**eTable 2.** Characteristics of the study population according to awareness of limiting fat intake

|                                   | Awareness of limiting fat intake |        |        |        | <i>P</i>            |
|-----------------------------------|----------------------------------|--------|--------|--------|---------------------|
|                                   | No                               |        | Yes    |        |                     |
|                                   | <i>N</i> (%)                     |        |        |        |                     |
| Men                               | 16,988                           | (100)  | 10,306 | (100)  |                     |
| Age, years                        |                                  |        |        |        |                     |
| 35–49                             | 4,252                            | (25.0) | 2,131  | (20.7) |                     |
| 50–59                             | 5,858                            | (34.5) | 3,135  | (30.4) | <0.001 <sup>a</sup> |
| 60–69                             | 6,878                            | (40.5) | 5,040  | (48.9) |                     |
| Awareness of limiting food intake |                                  |        |        |        |                     |
| Energy intake, yes                | 1,392                            | (8.2)  | 7,827  | (76.0) | <0.001 <sup>b</sup> |
| Sweets intake, yes                | 1,602                            | (9.4)  | 7,574  | (73.5) | <0.001 <sup>b</sup> |
| Dyslipidemia                      |                                  |        |        |        |                     |
| Yes                               | 6,972                            | (41.0) | 4,583  | (44.5) | <0.001 <sup>b</sup> |
| Medication, yes                   | 1,145                            | (16.4) | 1,429  | (31.2) | <0.001 <sup>b</sup> |
| BMI, kg/m <sup>2</sup>            |                                  |        |        |        |                     |
| <18.5                             | 578                              | (3.4)  | 163    | (1.6)  |                     |
| 18.5–24.9                         | 11,508                           | (67.7) | 6,809  | (66.1) | <0.001 <sup>b</sup> |
| ≥25.0                             | 4,902                            | (28.9) | 3,334  | (32.4) |                     |
| Women                             | 16,993                           | (100)  | 14,485 | (100)  |                     |
| Age, years                        |                                  |        |        |        |                     |
| 35–49                             | 4,635                            | (27.3) | 3,422  | (23.6) |                     |
| 50–59                             | 6,191                            | (36.4) | 4,840  | (33.4) | <0.001 <sup>a</sup> |
| 60–69                             | 6,167                            | (36.3) | 6,223  | (43.0) |                     |
| Awareness of limiting food intake |                                  |        |        |        |                     |
| Energy intake, yes                | 1,347                            | (7.9)  | 11,032 | (76.2) | <0.001 <sup>b</sup> |
| Sweets intake, yes                | 1,006                            | (5.9)  | 9,752  | (67.3) | <0.001 <sup>b</sup> |
| Dyslipidemia                      |                                  |        |        |        |                     |
| Yes                               | 4,352                            | (25.6) | 4,286  | (29.6) | <0.001 <sup>b</sup> |
| Medication, yes                   | 1,435                            | (33.0) | 2,169  | (50.6) | <0.001 <sup>b</sup> |
| BMI, kg/m <sup>2</sup>            |                                  |        |        |        |                     |
| <18.5                             | 1,616                            | (9.5)  | 1,047  | (7.2)  |                     |
| 18.5–24.9                         | 12,293                           | (72.3) | 10,600 | (73.2) | <0.001 <sup>b</sup> |
| ≥25.0                             | 3,084                            | (18.2) | 2,838  | (19.6) |                     |

BMI, body mass index.

<sup>a</sup>*P* values obtained by  $\chi^2$  test.

<sup>b</sup>*P* values obtained by logistic regression analysis after adjusted for age (a categorical variable).

**eTable 3.** Characteristics of the study population according to awareness of limiting sweets intake

|                                   | Awareness of limiting sweets intake |        |        |        | <i>P</i>            |
|-----------------------------------|-------------------------------------|--------|--------|--------|---------------------|
|                                   | No                                  |        | Yes    |        |                     |
|                                   | <i>N</i> (%)                        |        |        |        |                     |
| Men                               | 18,118                              | (100)  | 9,176  | (100)  |                     |
| Age, years                        |                                     |        |        |        |                     |
| 35–49                             | 4,483                               | (24.7) | 1,900  | (20.7) |                     |
| 50–59                             | 6,241                               | (34.5) | 2,752  | (30.0) | <0.001 <sup>a</sup> |
| 60–69                             | 7,394                               | (40.8) | 4,524  | (49.3) |                     |
| Awareness of limiting food intake |                                     |        |        |        |                     |
| Energy intake, yes                | 2,127                               | (11.7) | 7,092  | (77.3) | <0.001 <sup>b</sup> |
| Fat intake, yes                   | 2,732                               | (15.1) | 7,574  | (82.5) | <0.001 <sup>b</sup> |
| Glucose intolerance               |                                     |        |        |        |                     |
| Yes                               | 4,682                               | (25.8) | 3,617  | (39.4) | <0.001 <sup>b</sup> |
| Medication, yes                   | 620                                 | (13.2) | 1,013  | (28.0) | <0.001 <sup>b</sup> |
| BMI, kg/m <sup>2</sup>            |                                     |        |        |        |                     |
| <18.5                             | 606                                 | (3.3)  | 135    | (1.5)  |                     |
| 18.5–24.9                         | 12,363                              | (68.2) | 5,954  | (64.9) | <0.001 <sup>b</sup> |
| ≥25.0                             | 5,149                               | (28.4) | 3,087  | (33.6) |                     |
| Women                             | 20,720                              | (100)  | 10,758 | (100)  |                     |
| Age, years                        |                                     |        |        |        |                     |
| 35–49                             | 5,700                               | (27.5) | 2,357  | (21.9) |                     |
| 50–59                             | 7,539                               | (36.4) | 3,492  | (32.5) | <0.001 <sup>a</sup> |
| 60–69                             | 7,481                               | (36.1) | 4,909  | (45.6) |                     |
| Awareness of limiting food intake |                                     |        |        |        |                     |
| Energy intake, yes                | 3,300                               | (15.9) | 9,079  | (84.4) | <0.001 <sup>b</sup> |
| Fat intake, yes                   | 4,733                               | (22.8) | 9,752  | (90.7) | <0.001 <sup>b</sup> |
| Glucose intolerance               |                                     |        |        |        |                     |
| Yes                               | 3,938                               | (19.0) | 2,679  | (24.9) | <0.001 <sup>b</sup> |
| Medication, yes                   | 277                                 | (7.0)  | 465    | (17.4) | <0.001 <sup>b</sup> |
| BMI, kg/m <sup>2</sup>            |                                     |        |        |        |                     |
| <18.5                             | 1,975                               | (9.5)  | 688    | (6.4)  |                     |
| 18.5–24.9                         | 15,160                              | (73.2) | 7,733  | (71.9) | <0.001 <sup>b</sup> |
| ≥25.0                             | 3,585                               | (17.3) | 2,337  | (21.7) |                     |

BMI, body mass index.

<sup>a</sup>*P* values obtained by  $\chi^2$  test.

<sup>b</sup>*P* values obtained by logistic regression analysis after adjusted for age (a categorical variable).

**eFigure 1.** Directed acyclic graph of the association between awareness of limiting energy intake and all-cause mortality

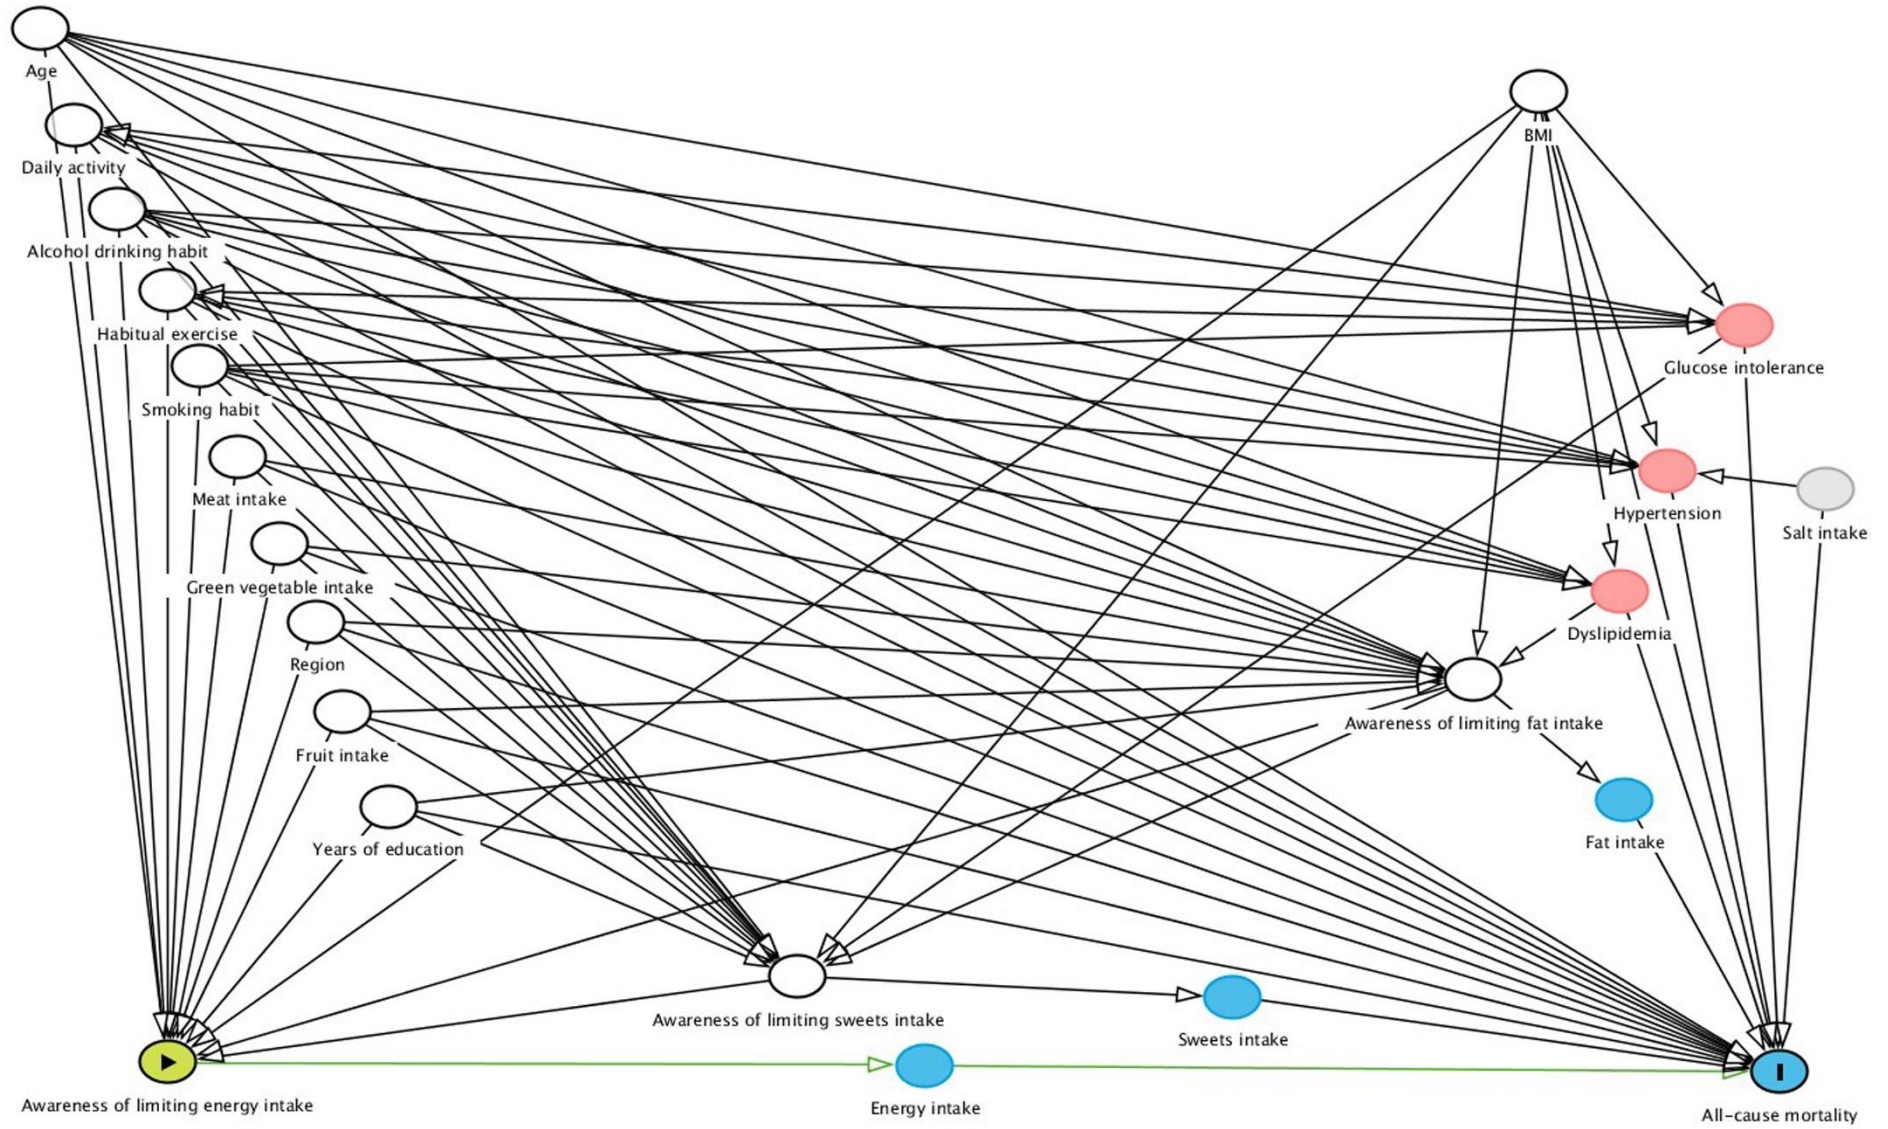

**eFigure 2.** Directed acyclic graph of the association between awareness of limiting fat intake and all-cause mortality

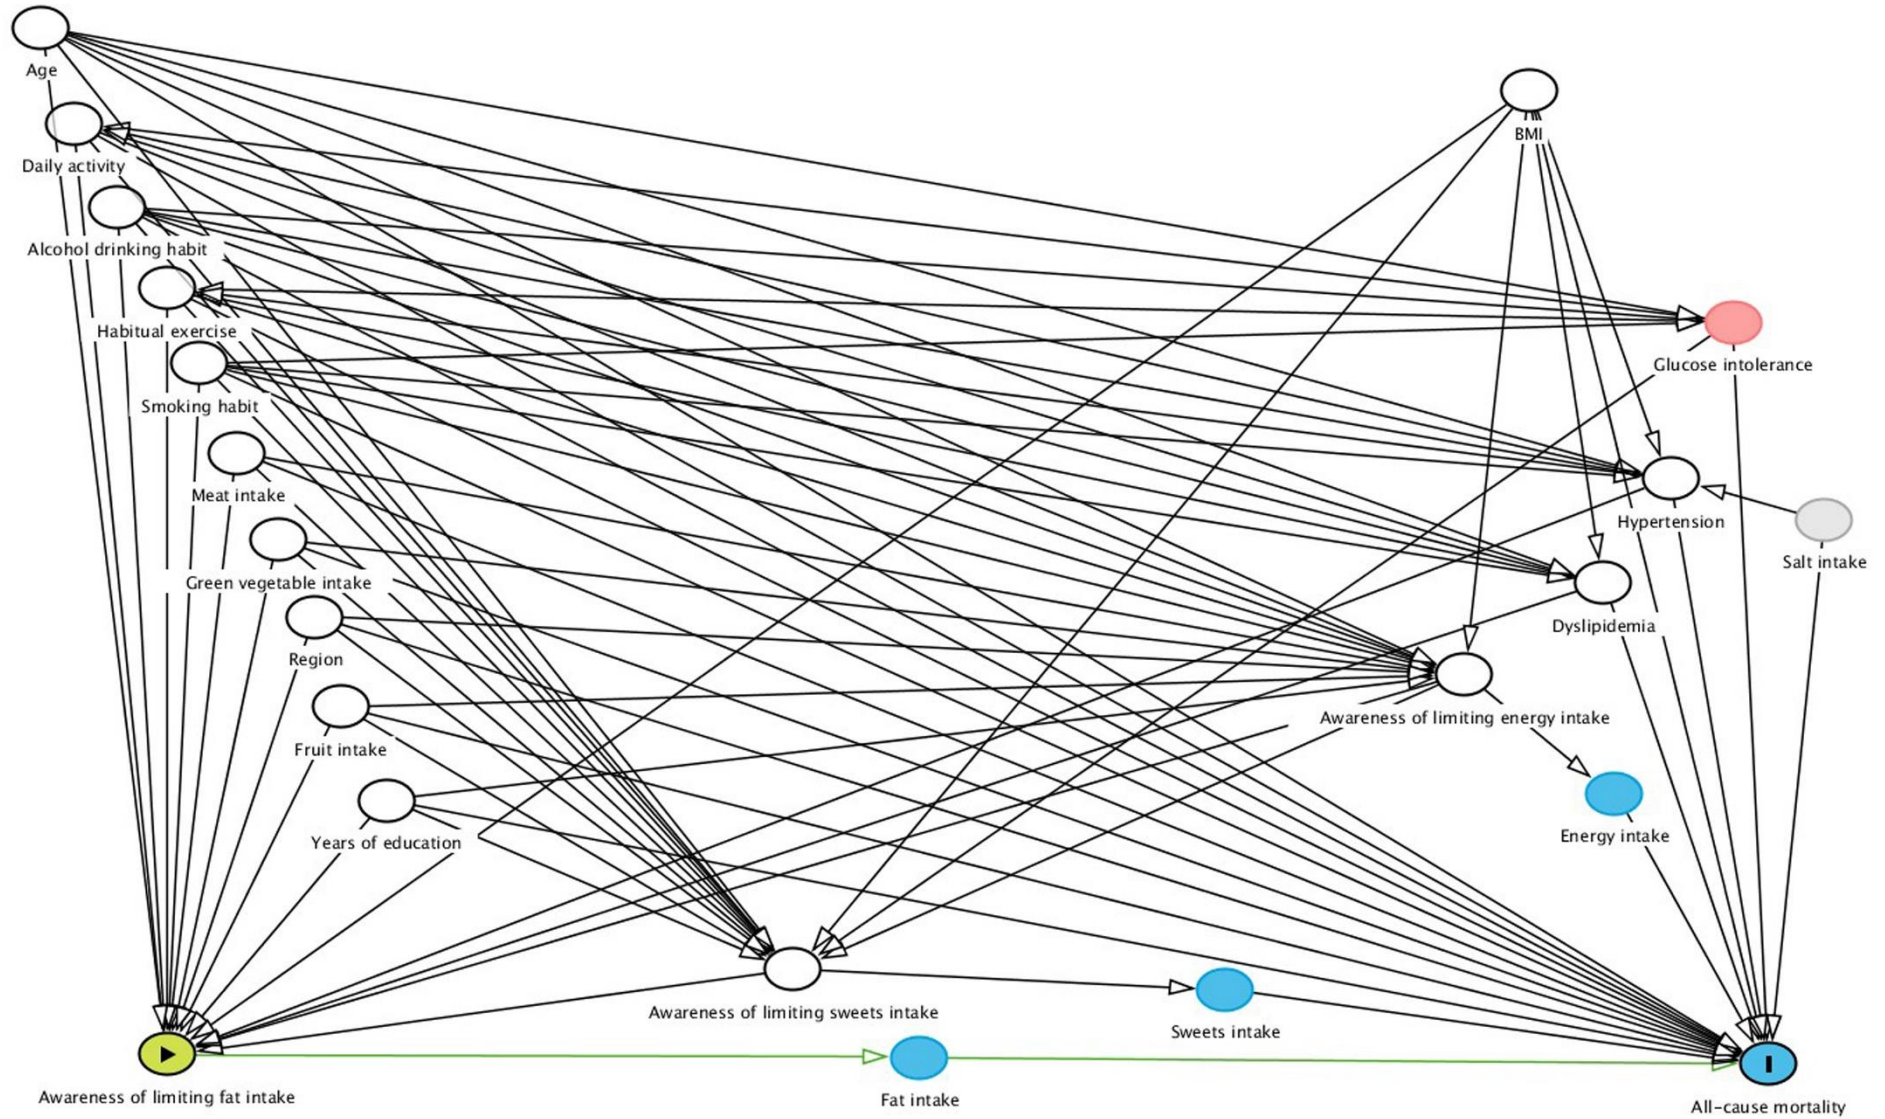



**eFigure 3.** Directed acyclic graph of the association between awareness of limiting sweets intake and all-cause mortality

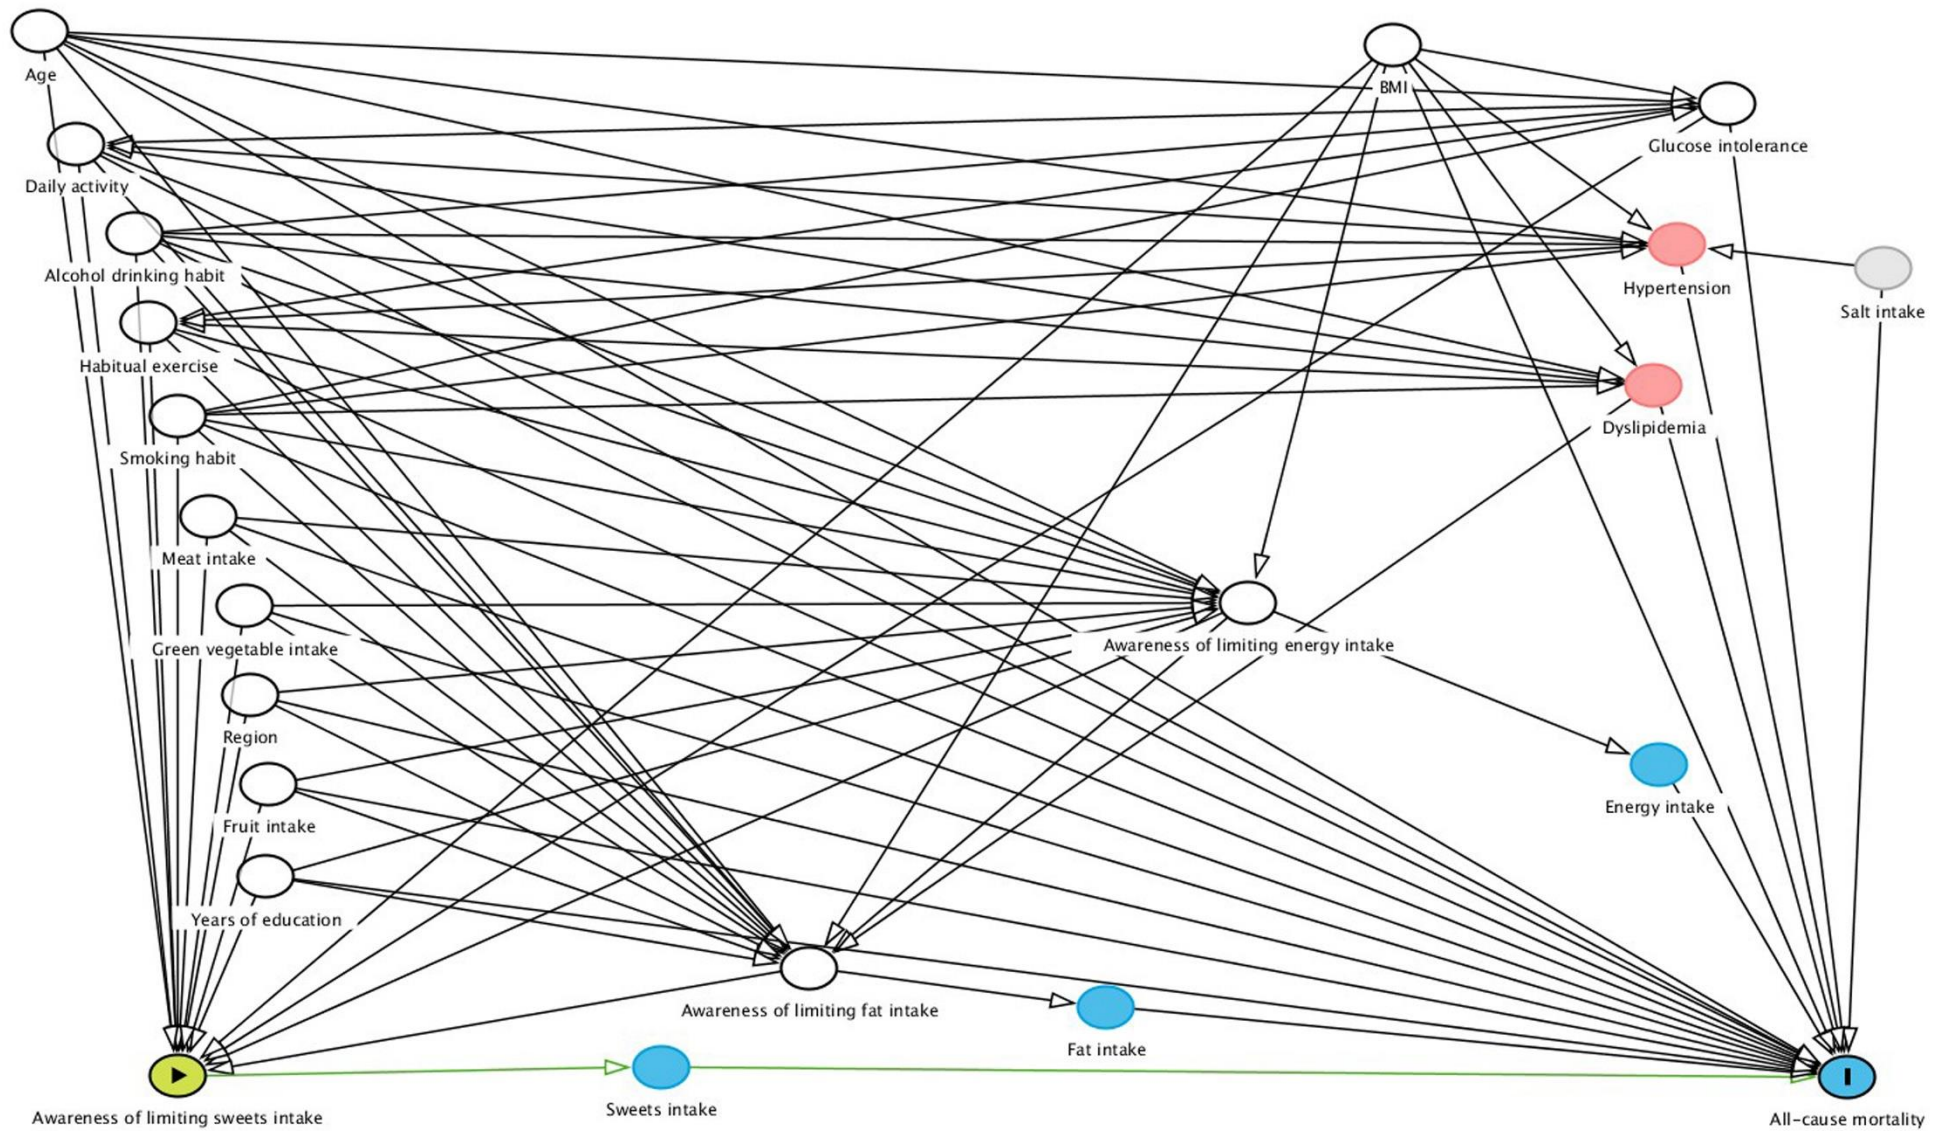

Supplement: je-34-286-s001.pdf [file je-34-286-s001.pdf]
